# Supplementary material
Source: HighWire-hosted journal article supplement (https://bmjopen.bmj.com/content/7/1/e013896)

## Supplementary files

### Appendix 1. Flow diagram of participant recruitment and selection.

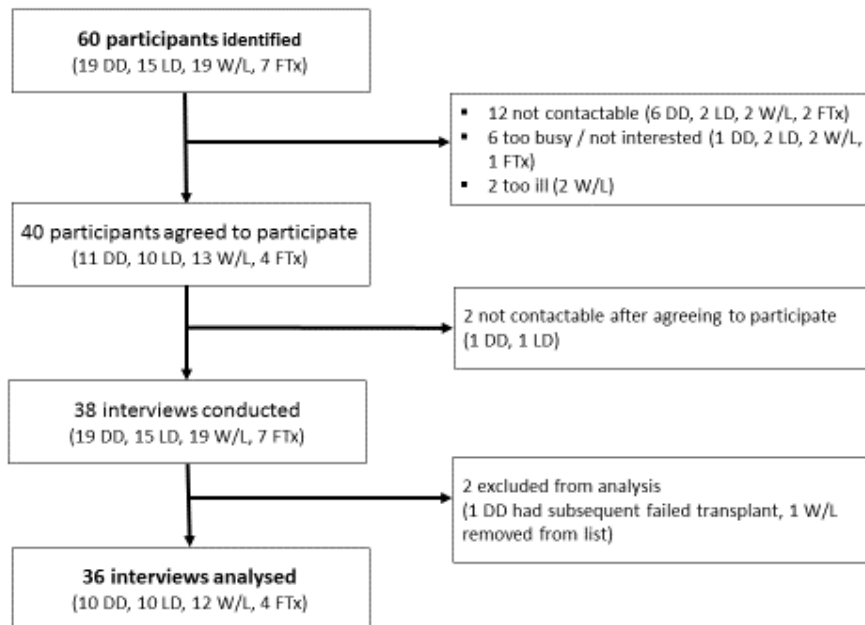

### Appendix 2. Diagram of themes

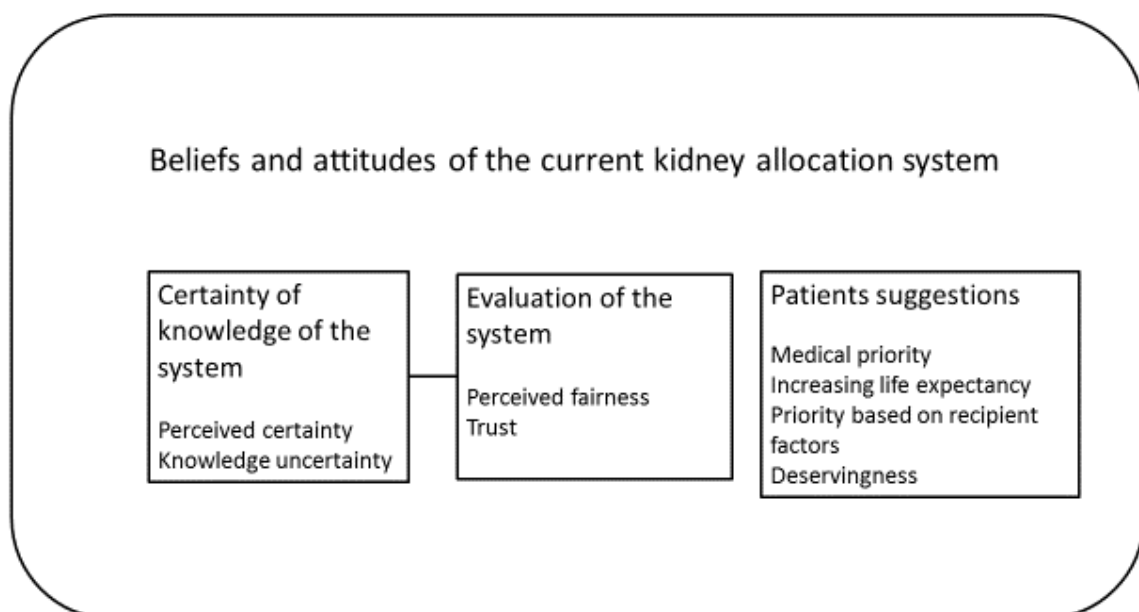

Supplement: inline-supplementary-material-1 [file inline-supplementary-material-1.pdf]
